## SHORT REPORT

# Melanopsin (Opn4) utilizes $G\alpha_i$ and $G\beta\gamma$ as major signal transducers

Dinesh Kankanamge, Kasun Ratnayake, Saroopa Samaradivakara and Ajith Karunarathne\*

## ABSTRACT

Melanopsin (Opn4), a ubiquitously expressed photoreceptor in all classes of vertebrates, is crucial for both visual and non-visual signaling. Opn4 supports visual functions of the eye by sensing radiance levels and discriminating contrast and brightness. Non-image-forming functions of Opn4 not only regulate circadian behavior, but also control growth and development processes of the retina. It is unclear how a single photoreceptor could govern such a diverse range of physiological functions; a role in genetic hardwiring could be one explanation, but molecular and mechanistic evidence is lacking. In addition to its role in canonical  $G_q$  pathway activation, here we demonstrate that Opn4 efficiently activates  $G_i$  heterotrimers and signals through the G protein  $\beta\gamma$ . Compared with the low levels of  $G_i$  pathway activation observed for several  $G_q$ -coupled receptors, the robust  $G\alpha_i$  and  $G\beta\gamma$  signaling of Opn4 led to both generation of  $PIP_3$  and directional migration of RAW264.7 macrophages. We propose that the ability of Opn4 to signal through  $G\alpha_i$  and  $G\beta\gamma$  subunits is a major contributor to its functional diversity.

**KEY WORDS:** Melanopsin, Opn4, Retinal, GPCR, G protein, Signal transduction, Opsin

## INTRODUCTION

Non-mammalian vertebrates employ Opn4, a G-protein-coupled receptor (GPCR) for extraocular photoreception (Beaulé et al., 2003). Photo-isomerization of chromophore-retinal in Opn4 induces its activation and governs downstream signaling by activating heterotrimeric G proteins. Opn4 was discovered in the melanophores of *Xenopus laevis* (African clawed frog) and later in tissues such as the eyes and deep brain of non-mammalian vertebrates (Beaulé et al., 2003; Panda et al., 2003). Two Opn4 isoforms, *Opn4L* and *Opn4S*, have been identified in mammals (Bellingham et al., 2006; Pires et al., 2007). In humans, Opn4 colocalizes with the circadian neuromodulator pituitary adenylate cyclase-activating polypeptide (ADCYAP1) in intrinsically photosensitive retinal ganglion cells (ipRGCs) (Hughes et al., 2016). They form part of the retinohypothalamic tract, which transmits photic information from the retina to suprachiasmatic nucleus to generate circadian rhythms. Opn4 is also present in other non-image-forming visual pathway structures, including the intergeniculate leaflet and olivary pretectal (Beaulé et al., 2003).

Opn4 functions as a photoreceptor by detecting brightness levels and discriminating visual signals (Brown et al., 2012). Opn4 also

allows visual circuits to acquire optimal settings and perform light adaptation by measuring irradiance levels (Allen et al., 2014; Hankins and Hughes, 2014). In addition to its visual roles, Opn4 contributes to a broad range of non-visual responses, including control of the circadian clock, pupillary constriction, pineal melatonin suppression, axon regeneration after nerve system injury and sleep regulation (Li et al., 2016; Panda et al., 2003; Piorz et al., 2016). Opn4 also influences plasma corticosterone levels, causing behavioral arousal and delaying sleep onset when exposed to blue light (Piorz et al., 2016).

Opsins, including Opn4, belong to class A G-protein-coupled receptors (GPCRs), the largest subfamily, representing 85% of GPCR genes (Raible et al., 2006). Most opsins reported in the literature are  $G_{i/o}$ -coupled GPCRs (Masseck et al., 2014; Terakita, 2005), several, including Opn4, are considered  $G_q$ -coupled, whereas the only known  $G_s$ -coupled opsin to date is jellyfish opsin (Koyanagi et al., 2008). It has been suggested that Opn4 may also activate the  $G_i$  pathway (Bailes and Lucas, 2013). However, no direct evidence supports Opn4-induced  $G\beta\gamma$  signaling. The present study shows that, in addition to its activation of the canonical  $G_q$  pathway, Opn4 also efficiently activates  $G\beta\gamma$  signaling, which may provide a molecular explanation for its functional diversity.  $G\beta\gamma$  controls the activity of several major signal transducers, including: (1)  $PI3K\gamma$  (Kolsch et al., 2008), (2) adenylyl cyclase (AC) isoforms (activation of AC2, AC4 and AC7; inhibition of AC1 and AC5) (Sunahara and Taussig, 2002; Tang and Gilman, 1991), (3) inwardly rectifying potassium channels (Kawano et al., 1999; Nakajima et al., 1996), (4) PLC isoforms ( $PLC\beta_2$ ,  $PLC\beta_3$ ) (Camps et al., 1992; Smrcka and Sternweis, 1993), (5)  $Ca^{2+}$  channels (N, P/Q type) (Herlitze et al., 1996; Ikeda, 1996), (6) GPCR kinase 2 (Pitcher et al., 1992), and (7) GEFs, including Rac, Cdc42 GEF (FLJ00018) and p114-GEF (Mayeenuddin et al., 2006; Niu et al., 2003; Ueda et al., 2008). The ability of  $G\beta\gamma$  to control such a large number of signaling regulators should allow cells to utilize  $G\beta\gamma$  signaling via Opn4 to perform their designated functions.

## RESULTS AND DISCUSSION

### Activated Opn4, but not ligand-binding $G_q$ -coupled GPCRs, efficiently induces $G\beta\gamma$ translocation

Our goal was to show that Opn4 possesses distinct heterotrimer activation abilities compared with other  $G_q$ -coupled GPCRs.  $G\alpha_qGTP$  generated upon  $G_q$ -coupled GPCR (including Opn4) activation stimulates  $PLC\beta$ , which hydrolyzes the plasma membrane (PM) phospholipid,  $PIP_2$ , and generates  $IP_3$  and DAG. HeLa cells expressing Opn4, mCherry- $\gamma_9$  and Venus-PH exhibited robust translocation of mCherry- $\gamma_9$  from the PM to inner membranes (IMs), with simultaneous  $PIP_2$  hydrolysis (Fig. 1A, left, Movies 1 and 2) when Opn4 is photoactivated at 515 nm in the presence of 50  $\mu M$  11-*cis*-retinal. Mean fluorescence changes in IMs (white arrow) and cytosol represent the rate and extent of  $G\gamma_9$  translocation and  $PIP_2$  hydrolysis, respectively. Despite its

Department of Chemistry and Biochemistry, The University of Toledo, Toledo, OH 43606, USA.

\*Author for correspondence (Ajith.karunarathne@utoledo.edu)

 A.K., 0000-0003-3136-2015

Received 7 November 2017; Accepted 23 April 2018

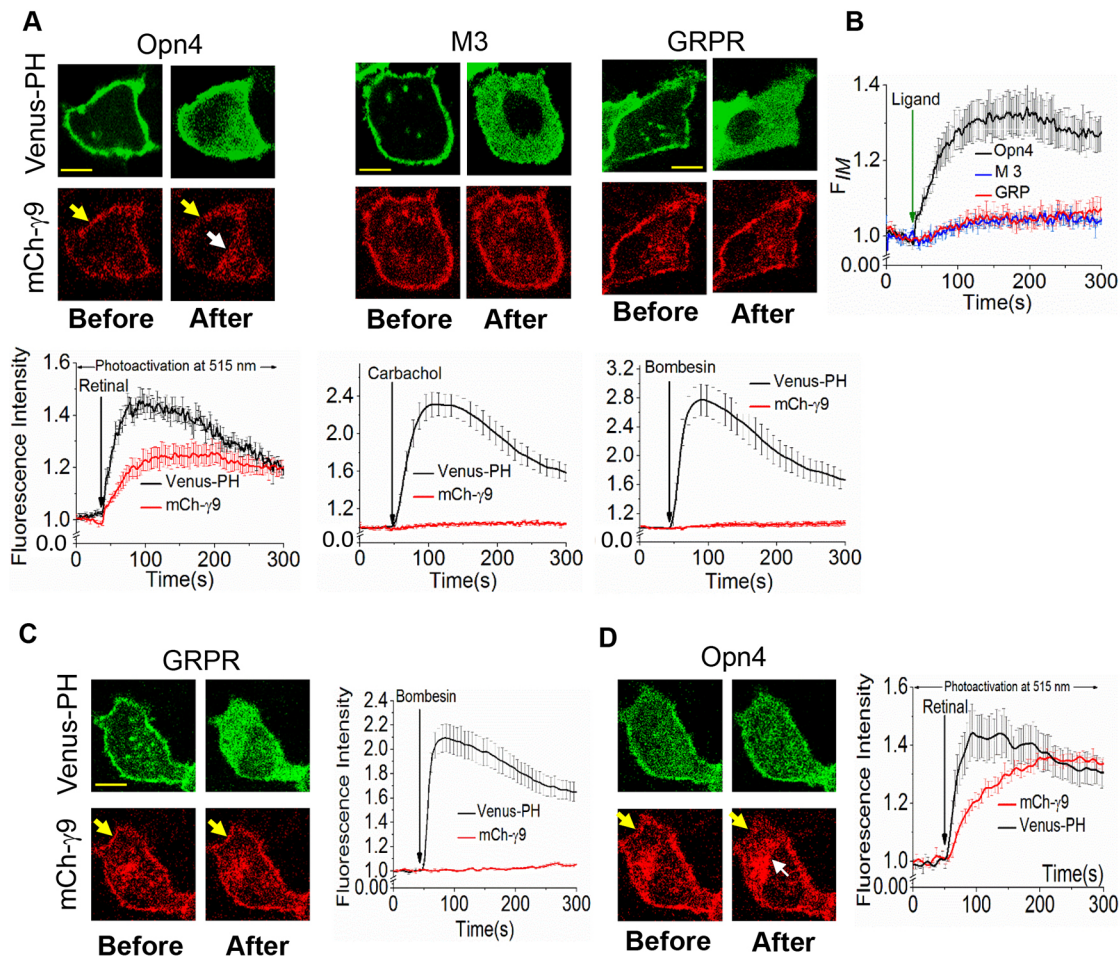

**Fig. 1. Ligand binding  $G_q$ -coupled GPCRs show only  $G_q$  pathway activation while Opn4 additionally induces  $G\beta\gamma$  translocation.** PIP<sub>2</sub> hydrolysis, and mCherry- $G\gamma_9$  and Venus-PH translocation in HeLa cells transiently expressing Opn4, GRPR and M3. (A) Opn4 activation by adding retinal at 50 s while exposing cells to 515 nm light (Venus-PH), induced mCherry- $\gamma_9$  translocation and PIP<sub>2</sub> hydrolysis. Activated GRPR and M3 exhibited PIP<sub>2</sub> hydrolysis but lacked pronounced  $G\gamma_9$  translocation. (B) Relative mCherry- $\gamma_9$  translocation induced by activated Opn4, M3 and GRP receptors. (C) The same cells expressing Opn4, GRPR, mCherry- $\gamma_9$  and Venus-PH were first activated with 1  $\mu$ M bombesin at 50 s. Cells show PIP<sub>2</sub> hydrolysis but lack  $G\gamma_9$  translocation. (D) After PIP<sub>2</sub> recovery at the PM, 11-*cis*-retinal (50  $\mu$ M) was added to the cell shown in C. The cell exhibited PIP<sub>2</sub> hydrolysis and robust  $G\gamma_9$  translocation from the PM (yellow arrows) to IMs (white arrows). Scale bars: 10  $\mu$ m. Average curves are shown for  $n \geq 10$  cells from  $\geq 3$  independent experiments. Results are mean  $\pm$  s.e.m.

previously shown promiscuity towards  $G_i$  heterotrimers (Offermanns et al., 1994; van Unen et al., 2016),  $G_q$ -coupled M3-muscarinic receptor (M3R) activation in HeLa cells only exhibited minor translocation of mCherry- $\gamma_9$  (Fig. 1A, middle, Movie 3). The  $G_q$ -coupled gastrin-releasing peptide receptor (GRPR) responded similarly (Movie 4). Nevertheless, Opn4, M3R and GRPR activation exhibited comparable PIP<sub>2</sub> hydrolysis responses (Fig. 1A). These data indicate that, like  $G_i$ -coupled GPCRs, Opn4 is more efficient at translocating free  $G\beta\gamma$  than both M3R and GRPR (Fig. 1B); however, different expression levels of receptors could alter the extent of signaling. Control cells lacking receptor expression did not exhibit PIP<sub>2</sub> hydrolysis upon exposure to carbachol, bombesin or 515 nm light (Fig. S1A), thus the  $G\beta\gamma$  translocation observed is a result of  $\alpha$ GTP and free  $G\beta\gamma$  generated by activated GPCRs (Akgoz et al., 2004, 2006; Bondar and Lazar, 2014).

We compared activated Opn4,  $G_i$ -coupled  $\alpha_2$ -AR and CXCR4-induced  $G\beta\gamma$  translocations (Movie 5). The broad absorption spectrum of Opn4 ( $\lambda_{max} \sim 480$  nm) (Enezi et al., 2011; van Oosterhout et al., 2012), allowed imaging of the fluorescence sensor upon photoactivation at 445, 488 and 515 nm (Fig. S1B).

Activated Opn4,  $\alpha_2$ AR and CXCR4 exhibited comparable  $G\gamma_9$  translocations (Fig. S2). To demonstrate the distinct ability of Opn4 to induce  $G\beta\gamma$  translocation compared with  $G_q$ -coupled GRPR, sequential activation of these receptors was examined in the same cells. HeLa cells expressing both Opn4 and GRPR together with mCherry- $\gamma_9$  and Venus-PH were imaged using 515 nm and 595 nm excitation wavelengths. At 40 s, GRPRs were activated using 1  $\mu$ M bombesin (Fig. 1C). Although an intense PIP<sub>2</sub> hydrolysis and robust recovery were observed, mCherry- $\gamma_9$  translocation was not detected (Fig. 1C, graph). After PIP<sub>2</sub> recovery, adding 11-*cis*-retinal at 50 s activated Opn4 in the same cell. Both PIP<sub>2</sub> hydrolysis and robust mCherry- $\gamma_9$  translocation were observed (Fig. 1D). This demonstrates the ability of activated Opn4, like  $\alpha_2$ -AR and CXCR4, to efficiently generate  $G\beta\gamma$  (Senarath et al., 2016).

#### Opn4 activation generates free $G\beta\gamma$ , primarily through activation of $G_{i/o}$ heterotrimers

Our next goal was to decipher the origin of free  $G\beta\gamma$  generated by activated Opn4.  $G\beta\gamma_9$  translocation and PIP<sub>2</sub> hydrolysis were examined in the presence of pertussis toxin (PTx). PTx catalyzes ADP-ribosylation of the  $G\alpha_i$  subunit and prevents coupling of



heterotrimers to GPCR (Ribeiro-Neto and Rodbell, 1989). HeLa cells expressing Opn4, mCherry- $\gamma_9$  and YFP-PH were incubated with 100 nM PTx for 5 h at 37°C. Opn4 activation did not induce G $\beta\gamma_9$  translocation (Fig. 2A, top). Interestingly, the same cells exhibited PIP<sub>2</sub> hydrolysis (Fig. 2A, bottom). This demonstrates that Opn4 induces translocation of G $\beta\gamma_9$  generated through the G<sub>i</sub> pathway. Whether the observed G $\beta\gamma_9$  translocation is a result of G<sub>q</sub> heterotrimer activation was examined. HeLa cells were incubated with G<sub>q</sub> inhibitor YM-254890 (1  $\mu$ M) for 5 min at 37°C, to block G<sub>q</sub> heterotrimer dissociation by preventing GDP-GTP exchange (Takasaki et al., 2004). With YM-254890, Opn4 activation still induced efficient G $\beta\gamma_9$  translocation (Fig. 2B, top) from the PM (yellow arrows) to IMs (white arrow), while G<sub>q</sub>-mediated PIP<sub>2</sub> hydrolysis was abolished (Fig. 2B, bottom). Similarly, HeLa cells treated with only vehicle solvent used for PTx (Fig. S3A) and YM-254890 (Fig. S3B) exhibited both PIP<sub>2</sub> hydrolysis and G $\gamma_9$  translocation. Collectively, these data suggest that Opn4 can simultaneously activate G $\alpha_i$  and G $\alpha_q$  signaling in the same cells to a comparable extent, and G $\alpha_i$ -heterotrimer activation induces G $\beta\gamma$  translocation. Whether Opn4 activates translocation of other G $\gamma$  subunits was also examined. HeLa cells transiently expressing Opn4 and either YFP- $\gamma_1$  or YFP- $\gamma_{11}$  and pre-treated with 11-*cis*-retinal exhibited significant G $\gamma_1$  and G $\gamma_{11}$  translocations from the PM (yellow arrows) to IMs (white arrows) upon Opn4 activation (Fig. 2C). Similarly, Opn4 activation also induced G $\beta_1$ -YFP translocation (Fig. 2C, bottom). This clearly demonstrates that Opn4 activates G protein heterotrimers, regardless of G $\gamma$  subtype. G $\beta_1$  translocation indicates that it translocates as a G $\beta\gamma$  dimer, as we have showed previously (Senarath et al., 2018).

Dimerization of certain GPCR combinations, activating distinct heterotrimer types has been demonstrated (Terrillon and Bouvier, 2004). To test the likelihood of Opn4 forming a heterodimer with a specific G<sub>i</sub>-coupled GPCR in HeLa cells, activation of G<sub>i</sub> signaling upon optical activation of Opn4 was examined using H125 lung carcinoma cells. The different origins of HeLa and H125 cells makes it highly unlikely that both cell types express the same GPCR, which can dimerize with Opn4 to induce its G<sub>i</sub> activity. H125 cells expressing Opn4, mCherry- $\gamma_9$  and Venus-PH, pre-incubated with 11-*cis*-retinal, also exhibited both mCherry- $\gamma_9$  translocation (yellow and white arrows) and PIP<sub>2</sub> hydrolysis upon Opn4 activation (Fig. 2D). This indicates that Opn4 induces mCherry- $\gamma_9$  translocation.

### Opn4 induces downstream signaling through G $\alpha_q$ , G $\alpha_i$ and G $\beta\gamma$

The next objective was to examine concurrent activation of G $\alpha_q$  and G $\beta\gamma$  effectors by activated Opn4. Both G $\alpha_q$ GTP and G $\beta\gamma$  activate PLC $\beta$ , hydrolyzing PIP<sub>2</sub> to IP<sub>3</sub> and DAG (Park et al., 1993; Wu et al., 1993). DAG stays bound to the PM (Kamp and Hell, 2000; Park et al., 1993). Generation of DAG in HeLa cells was measured using translocation of an mCherry-conjugated DAG binding domain (DBD) sensor from the cytosol to the PM (Gallegos et al., 2006). 11-*cis*-retinal was added at 50 s to HeLa cells expressing mCherry-DBD and Opn4-YFP. Upon Opn4 activation, cytosolic DAG sensor translocated to the PM (Fig. 3A, top). While the receptor remained in an active state, the DBD sensor reverse-translocated to the cytosol, probably due to adaptation of PIP<sub>2</sub> hydrolysis (Ferguson and Caron, 1998; Gainetdinov et al., 2004). Cells treated with G<sub>q</sub> inhibitor did not exhibit any detectable mCherry-DBD translocation (Fig. 3A, bottom). Calcium mobilization elicited by Opn4-generated IP<sub>3</sub> was measured using HeLa cells pre-incubated with the calcium indicator Fluo-4 AM

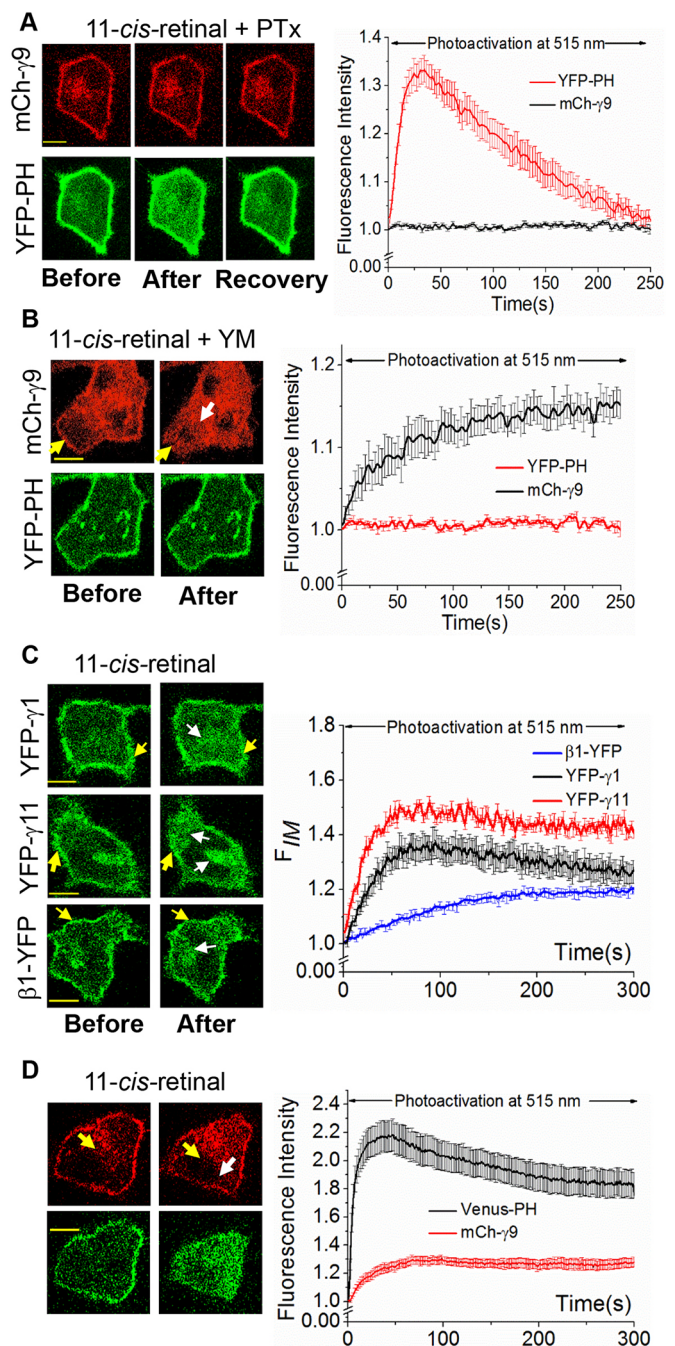

**Fig. 2. Opn4 exhibits concurrent activation of both G<sub>i</sub> and G<sub>q</sub> heterotrimers.** PIP<sub>2</sub> hydrolysis (YFP-PH) and G $\gamma_9$  translocation (mCherry- $\gamma_9$ ) in HeLa cells (pre-incubated with 50  $\mu$ M 11-*cis*-retinal) after activation of Opn4 in the presence of (A) PTx (100 nM) and (B) G<sub>q</sub> inhibitor YM-254890 (1  $\mu$ M). PTx inhibited G $\gamma_9$  translocation, YM-254890 inhibited PIP<sub>2</sub> hydrolysis. (C) Opn4 activation induced translocation of YFP tagged  $\gamma_1$  (top),  $\gamma_{11}$  (middle) and  $\beta_1$  (bottom) in HeLa cells pre-incubated with 50  $\mu$ M 11-*cis*-retinal. (D) PIP<sub>2</sub> hydrolysis,  $\gamma_9$  translocation upon Opn4 activation in H125 cells. Yellow arrows, PM; white arrows, IM. Scale bars: 10  $\mu$ m. Average curves are plotted for  $n \geq 10$  cells from  $\geq 3$  independent experiments. Results are mean  $\pm$  s.e.m.

(2.28  $\mu$ M). Cells were imaged using 488 nm excitation and 515 nm emission to capture Fluo-4 fluorescence. Opn4-expressing cells exhibited increases in Ca<sup>2+</sup> upon addition of 11-*cis*-retinal, which was transient and gradually disappeared (Fig. 3B, top). Cells incubated with G<sub>q</sub> inhibitor did not exhibit any Ca<sup>2+</sup> increase on Opn4 activation (Fig. 3B, bottom). These data suggest that

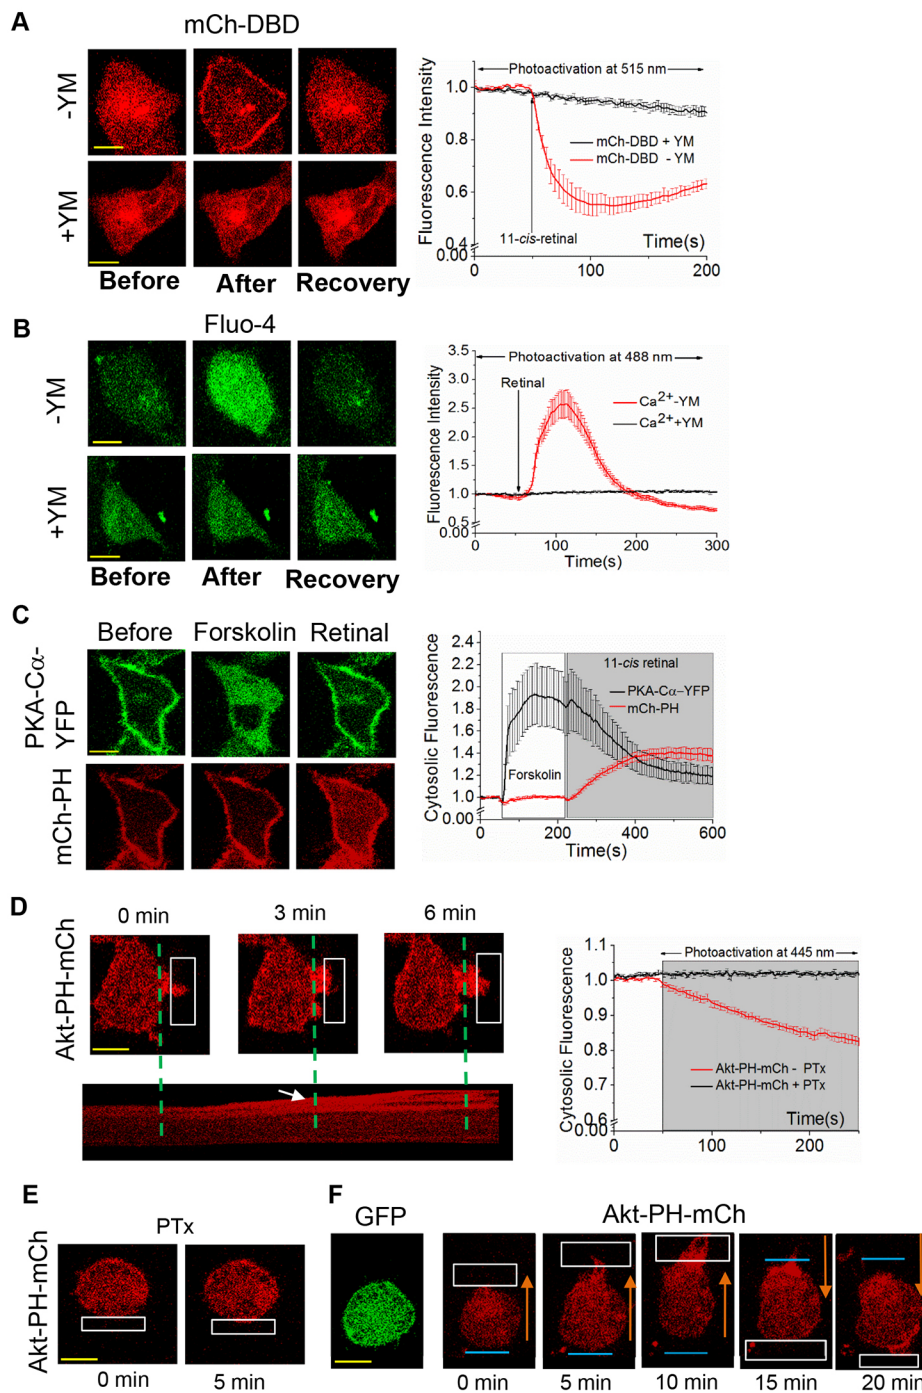

**Fig. 3. Opi4 activates PLC $\beta$ , AC and PI3K signaling through G $\alpha_q$ , G $\alpha_i$  and G $\beta\gamma$ , respectively.** (A) DAG formation on PM in HeLa cells with and without the G $_q$  inhibitor (YM-254890) after Opi4 activation. YM-254890 inhibited DAG formation. (B) Opi4 induced cytosolic Ca<sup>2+</sup> responses in HeLa cells with and without G $_q$  inhibitor. YM-254890 inhibited the Ca<sup>2+</sup> response. (C) Opi4-induced G $\alpha_i$  activation inhibited the forskolin-IBMX induced AC activation and cAMP generation (PKA- $\delta$ R11 $\beta$ : PKA-C $\alpha$ -YFP). PIP<sub>3</sub> production in RAW264.7 cells (pre-incubated with 50  $\mu$ M 11-*cis*-retinal) upon optical activation of Opi4 in the absence (D) and presence of 100 ng/ml PTx (E). (F) Time-lapse images show Opi4-induced PIP<sub>3</sub> production at the leading edge of RAW264.7 cells and directional migration (orange arrows) in the presence of G $_q$  inhibitor (blue line indicates start). Scale bars: 10  $\mu$ m. Average curves plotted for  $n=10$  cells from  $\geq 3$  independent experiments. Results are mean  $\pm$  s.e.m.

G $_q$ -pathway activation is primarily responsible for Opi4-regulated Ca<sup>2+</sup> and DAG signaling. G $_i$  pathway activation by Opi4 was measured in HeLa cells using a bi-molecular translocation-based cAMP sensor, PKA- $\delta$ R11 $\beta$ : PKA-C $\alpha$ -YFP (Dyachok et al., 2006; Siripurapu et al., 2017). Briefly, HeLa cells expressing Opi4, cAMP sensor, and mCherry-PH were exposed to 10  $\mu$ M forskolin in IBMX (3-isobutyl-1-methylxanthine). Cells exhibited complete translocation of PKA-C $\alpha$ -YFP from the PM to the cytosol, indicating cAMP generation (Fig. 3C, top middle). After  $\sim 3$  min, 11-*cis*-retinal was added, activating Opi4, and cells exhibited a reverse translocation of PKA-C $\alpha$ -YFP. This indicates G $\alpha_i$ -mediated inhibition of AC and cAMP production. A simultaneous PIP<sub>2</sub> hydrolysis upon Opi4 activation was also observed (Fig. 3C, bottom).

G $\beta\gamma$  is a crucial signal transducer for cellular homeostasis and it controls a cohort of essential effectors in the GPCR pathway. We demonstrated that only cells expressing high PM affinity G $\gamma$  subtypes ( $\gamma_2$ ,  $\gamma_3$ ) activate PM-bound effectors of G $\beta\gamma$ , including PI3K and PLB $\beta$  (Senarath et al., 2018). HeLa cells lack  $\gamma_2$  and  $\gamma_3$ , and exhibit only minor PIP<sub>3</sub> production upon G $_i$  pathway activation, whereas  $\gamma_3$ -expressing RAW264.7 cells exhibit PIP<sub>3</sub> production (Senarath et al., 2018). We also showed that localized G $_i$  pathway activation and G $\beta\gamma$  generation in RAW264.7 cells induces directional migration, accompanied by PIP<sub>3</sub> generation at the leading edge (Senarath et al., 2018; Siripurapu et al., 2017). Thus, Opi4-induced PIP<sub>3</sub> generation and cell migration were examined using RAW264.7 cells. RAW264.7 cells expressing Opi4-GFP and



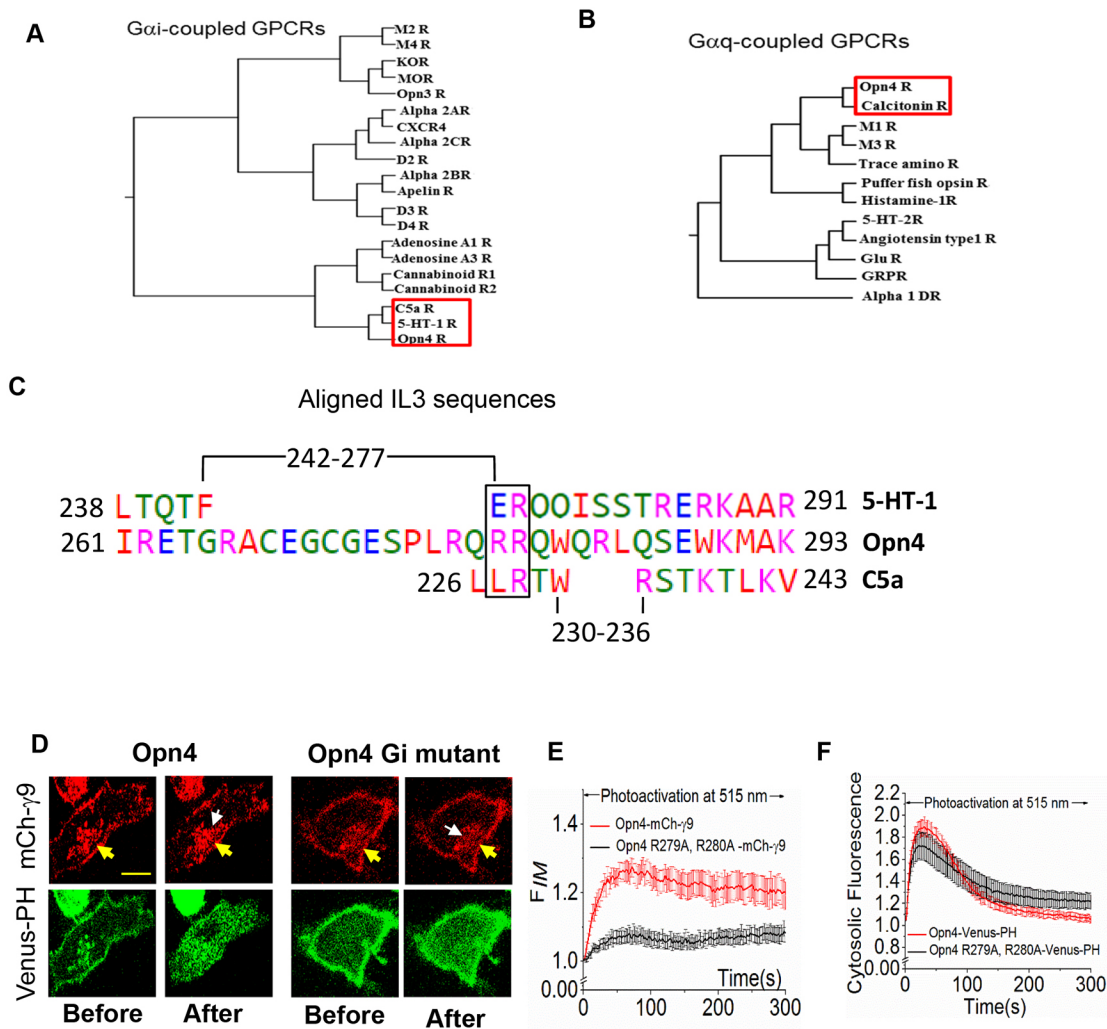

**Fig. 4. Opn4 sequence and its dual pathway ( $G_i$ ,  $G_q$ ) activation ability.** (A) Phylogenetic analysis of  $G_i$ -coupled GPCRs based on sequence alignment for IL3 regions. C5a and 5-HT-1 clustered with Opn4 (red box). (B)  $G_q$ -coupled GPCR, calcitonin clusters with Opn4 based on IL3-regions (red box). (C) Sequence alignments for  $G_i$ -coupled 5HT-1-Opn4 and C5a-Opn4. The mutations in box (R to A) resulted in a  $G_i$ -activity deficient mutant. (D)  $G_{\gamma 9}$  translocation and PIP<sub>2</sub> hydrolysis after activating wild-type Opn4 (left) and a  $G_i$ -deficient mutant of Opn4 (right). Yellow arrows, PM; white arrows, IM. (E)  $G_{\gamma 9}$  translocation induced by a  $G_i$ -deficient mutant of Opn4 is minor compared with that induced by wild-type Opn4. Difference in the extent of  $\gamma_9$  translocation exhibited by wild-type and mutant Opn4 is statistically significant ( $P < 0.0001$ ). (F) WT and mutant Opn4 induce similar levels of PIP<sub>2</sub> hydrolysis. Scale bar: 10  $\mu$ m. Average curves plotted for  $n \geq 10$  cells from  $\geq 3$  independent experiments. Results are mean  $\pm$  s.e.m.

Akt-PH-mCherry (PIP<sub>3</sub> sensor) and treated with 11-*cis*-retinal were exposed to a spatially restricted blue light stimulus (Fig. 3D, white box). Time-lapse images clearly indicate PIP<sub>3</sub> production at the optically activated leading edge. The orthogonal slice shows accumulation of PIP<sub>3</sub> at the PM (white arrow) (Fig. 3D). This Opn4-induced PIP<sub>3</sub> production was abolished by PTx (Fig. 3E), as well as by the  $G_{\beta\gamma}$  inhibitor Gallein (Lehmann et al., 2008) (Fig. S3C). This indicates that Opn4-induced PIP<sub>3</sub> production is independent of the  $G_q$  pathway and is governed by free  $G_{\beta\gamma}$ . Additionally, activation of Opn4 in the presence of  $G_i$  inhibitor resulted in not only PIP<sub>3</sub> production but also a noticeable cell migration (Fig. 3F). Generated PIP<sub>3</sub> alone can activate many signaling pathways, including Akt/PKB, several GEFs (Tiam1, P-Rex1), tyrosine kinase (Btk), and growth factor receptor-bound protein 2 (Grb2) to control cellular functions ranging from migration to gene transcription (Chen et al., 2012; Karunarathne et al., 2013; Weiner, 2002). Since Opn4 induces PIP<sub>3</sub> generation, in addition to its signaling through  $G_{\alpha_i}$ , it should control PIP<sub>3</sub>-regulated pathways, thus affecting diverse cellular functions.

#### Sequence properties of Opn4 that enable its ability to activate both $G_i$ and $G_q$ pathways

Since Opn4 short (Opn4S) and long (Opn4L) splice variants in ipRGCs are anticipated to deliver diverse cellular functions (Hughes et al., 2012; Pires et al., 2009), we examined whether they possess distinct signaling activities. We generated Opn4S by truncating the C-terminus (Ct) of Opn4L (or Opn4). When expressed in HeLa cells, Opn4S and Opn4L exhibited similar signaling properties (Fig. 1A, left, Fig. S4A). Overall, these data suggest that  $G_i$  and  $G_q$  pathway selectivity in Opn4 is independent of its Ct domain.

To govern both  $G_i$  and  $G_q$  signaling, Opn4 should be able to interact with both  $G_i$  and  $G_q$  heterotrimers. GPCRs recognize heterotrimers with appropriate  $G_{\alpha}$  types, primarily using intracellular loop 3 (IL3) (Itoh et al., 2001). We examined IL3 regions of  $G_i$ - and  $G_q$ -coupled GPCRs and compared them with the IL3 sequence of Opn4 using MAFFT multiple sequence alignment software (Fig. 4A,B) (Kato et al., 2002; Kato and Standley, 2013). This analysis showed that IL3 of Opn4 clustered with the IL3 regions of  $G_i$ -coupled complement 5a receptor (C5a) and serotonin receptor

(5-HT-1) (Fig. 4A), and the IL3 region of Opn4 clustered with  $G_q$ -coupled calcitonin receptor (Fig. 4B). Interestingly, the left side of the IL3 region of Opn4 exhibited  $G_q$ -coupled (Fig. S4B) whereas the right side showed  $G_i$ -coupled GPCR-like characteristics (Fig. 4C). Left side mutations of IL3 – R262A, E263A and T264A (Fig. S4B, box) – resulted in completely non-responsive Opn4. This result suggests either that  $G_q$ -Opn4 coupling prior to  $G_i$  heterotrimer formation is crucial for their activation, or that mutations in the left side of IL3 may alter Opn4 conformation, rendering it non-functional. Among right side mutations, mutant R279A, R280A Opn4 (Fig. 4C, box) exhibited a 4-fold lower level of mCherry- $\gamma$ , translocation compared with wild-type Opn4 (Fig. 4D,E). Its ability to induce  $PIP_2$  hydrolysis remained intact (Fig. 4D,F). This further suggests that Opn4 interacts with and activates both  $G_q$  and  $G_i$  heterotrimers.

Since Opn4 can activate  $G\alpha_i$  and regulate cAMP, it can control axonal regeneration and sleep regulation (Hannila and Filbin, 2008; Spencer and Filbin, 2004).  $G_i$ -coupled melatonin 2 receptor controls circadian rhythms by regulating both  $G\alpha_i$  and  $G\beta\gamma$  (Dubocovich and Markowska, 2005; Dubocovich et al., 2003). Muscarinic receptor-induced  $G_i$  signaling has been shown to regulate pupillary constriction and dilation in human (Abrams et al., 2006), serum corticosterone levels and the sleep-wake cycle in mice (Hemrick-Luecke et al., 2002). Therefore, Opn4 can regulate these functions by activating  $G_i$  pathway. Considering the broad range of effectors and cellular functions controlled by the  $G_i$  pathway, especially through  $G\beta\gamma$ , the functional diversity of Opn4 and its ability to signal through multiple pathways are likely to be linked.

## MATERIALS AND METHODS

### DNA constructs, reagents and cell lines

YFP-PH cDNA has been previously described (Gallegos et al., 2006). Bi-cistronic Opn4-GFP, mCherry- $\gamma$ , mCherry-PH, M3R, mCherry-DBD, Venus-PH and Akt-PH-mCherry cDNAs were kindly provided by Professor Narasimhan Gautam's lab (Washington University, St Louis, MO). GRPR was a kind gift from the lab of Zhou-Feng Chen (Washington University, St Louis, MO). Opn4 PCR product was inserted into *KpnI* and *XbaI* sites in pcDNA 3.1 to create untagged Opn4. Opn4S was created by adding a stop codon to Opn4L after aligning splice variants (Opn4L and Opn4S). Overlap PCR and Gibson assembly were performed to generate Opn4 R279A, R280A mutant based on multiple sequence alignment data described. Reagent sources are as follows: pertussis toxin (PTx) and norepinephrine (Sigma-Aldrich), Gibson assembly master mix and competent cells (NEB, Ipswich, MA, USA), YM-254890 (Focus Biomolecules, Plymouth Meeting, PA, USA), Fluo-4 AM (Molecular Probes, Eugene, OR, USA), Bombesin (Tocris, Park Ellisville, MO, USA), Carbachol (Fisher Scientific, Pittsburgh, PA, USA), SDF-1 $\alpha$  (PeproTech, Rocky Hill, NJ, USA), 11-*cis*-retinal (National Eye Institute, Bethesda, MD, USA), PolyJet (SignaGen, Rockville, MD, USA), IBMX and Forskolin (Cayman Chemical, Ann Arbor, MI, USA). All the reagents were dissolved in the appropriate solvent according to the manufacturers' instructions and diluted in 1% HBSS supplemented with  $NaHCO_3$  or regular cell culture medium before adding to cells. Cell lines (HeLa, RAW264.7) were originally purchased from the American Tissue Culture Collection (ATCC, Manassas, VA, USA) and authenticated using a commercial kit to amplify 9 unique STR loci. NCI-H125 cell line was kindly provided by Dr Randall Ruch (University of Toledo, OH, USA).

### Cell culture and transfections

RAW264.7 mouse macrophage cell line (ATCC) was cultured in RPMI 1640 (10-041-CV; CORNING, Manassas, VA, USA) with 10% fetal bovine serum (Atlanta Biologicals, Flowery Branch, GA, USA), L-glutamine and 1% penicillin-streptomycin in a humidified incubator at 37°C and 5%  $CO_2$ . At 75% confluency, cells were lifted after incubation with versene-EDTA (CellGro) for 3 min at 37°C, centrifuged at 1000 g for 3 min and versene-

EDTA was aspirated before resuspending cells in RPMI 1640 with 10% dialyzed fetal bovine serum at  $8 \times 10^4$ /ml cell density. One day before transfection of DNA into cells,  $8 \times 10^4$  cells were seeded on 35 mm glass bottom dishes (In Vitro Scientific). HeLa cells (ATCC) were cultured in minimum essential medium (CellGro) containing 10% fetal bovine serum (Atlanta Biologicals), in the presence of 1% penicillin-streptomycin in 60 mm tissue culture dishes in a humidified incubator at 37°C, 5%  $CO_2$ . The remaining cell culture procedures for HeLa cells were similar to the protocols described above for RAW264.7 cells. Transfection was performed using PolyJet transfection reagent (SignaGen, Rockville, MD, USA) according to the manufacturer's protocol and imaging was performed 12-14 h after transfection. Before imaging, cell culture medium was replaced with Hank's Balanced Salt Solution (HBSS) that was equilibrated for 1 h at 37°C and 5%  $CO_2$ .

### Phylogenetic analysis

$G_i$ - and  $G_q$ -coupled GPCRs were identified (Alexander et al., 1999, 2017). The IL3 regions of  $G_i$ - and  $G_q$ -coupled receptors were examined by HMMTOP transmembrane prediction software (<http://www.enzim.hu/hmmtop/>). GenomeNet bioinformatics tools ([http://www.genome.jp/en/gn\\_tools.html](http://www.genome.jp/en/gn_tools.html)) were utilized to perform sequence analysis and tree generation. Sequences of IL3 regions of  $G_i$ - and  $G_q$ -coupled receptors were aligned using MAFFT (Katoh and Standley, 2013; <https://mafft.cbrc.jp/alignment/software/>). Aligned sequence phylogenies were subjected to unweighted pair-group method using arithmetic averages (UPGMA) clustering to generate phylogenetic trees.

### Opn4 activation and imaging of $PIP_2$ hydrolysis, DAG formation, $PIP_3$ and cAMP production, and $G\beta\gamma$ translocation

A Nikon-Andor spinning disk confocal imaging system, with a Nikon Ti-R/B inverted microscope, a Yokogawa CSU-X1 spinning disk unit (5000 rpm) and iXon ULTRA 897BV back illuminated deep-cooled EMCCD camera was used. Photo-activation of selected regions of Opn4 was conducted using an Andor Fluorescence Recovery After Photo bleach and Photo Activation (FRAP-PA) unit. All DNA constructs were transiently transfected and cells were imaged after overnight transfection. Bi-cistronic vectors carrying Opn4 and GFP, Opn4 untagged and Opn4-GFP constructs were used to transiently express Opn4 and their expression was confirmed by using cytosolic GFP,  $PIP_2$  hydrolysis or  $G\beta\gamma$  translocation on activation or using the GFP tag, respectively. Imaging of cells was carried out using a 60 $\times$ , 1.4 NA oil objective employing 50 mW 445, 488, 515, 595 nm solid-state lasers. Sensors were imaged using the following settings: GFP and Fluo-4 AM, 488 nm at 56  $\mu$ W/515 nm; YFP and Venus, 515 nm at 22  $\mu$ W/540 nm; mCherry, 594 nm at 20  $\mu$ W/630 nm (excitation/emission). Cells were pre-incubated with 50  $\mu$ M 11-*cis*-retinal unless otherwise specified. Optical activation was performed using a FRAP-PA device by drawing a desired light exposure region in the field of vision and exposing those areas to 445 nm blue light pulsed at 1 Hz at 0.22  $\mu$ W. Imaging of sensors for  $PIP_2$ ,  $PIP_3$ , DAG and  $G\beta\gamma$  translocation were also performed at 1 Hz; since Opn4 has a broad absorption spectra, imaging YFP activates it. Digital image analysis was performed using Andor iQ 3.1 software and fluorescence intensity obtained from regions of interest (PM, IMs and cytosol) was normalized to initial value (baseline). Normalized data were then plotted using Origin pro (OriginLab Corporation). Results of all quantitative assays ( $G\beta\gamma$  translocation and  $PIP_2$  hydrolysis,  $Ca^{2+}$  responses) are expressed as standard error of mean (s.e.m.) from  $n$  number of cells (indicated in the figure legends) on multiple days, using cells with a different passage number.

### Intracellular $Ca^{2+}$ measurements

For cytosolic  $Ca^{2+}$  measurements, HeLa cells were cultured on glass-bottomed dishes in MEM/DFBS at 37°C with 5%  $CO_2$  as described above. Experiments were performed 12-24 h after transfection of DNA. Opn4-transfected cells were washed twice with 1% (v/v) HBSS supplemented with  $NaHCO_3$  and  $Ca^{2+}$ , adjusted to pH 7.2, and incubated for 30 min at room temperature with the fluorescent  $Ca^{2+}$  indicator, Fluo-4 AM (2.28  $\mu$ M) in dark conditions. Before imaging, cells were again washed twice with 1% HBSS supplemented with  $NaHCO_3$  and  $Ca^{2+}$  to remove excess Fluo-4 AM.



Processed dishes were mounted and fluorescence intensity of Fluo-4 AM (488 nm) was continuously imaged at 1 s intervals using 488 nm excitation, 515 nm emission for confocal microscopy. Fluo-4 AM fluorescence intensity obtained from regions of interest was normalized to initial value.

### Statistics and reproducibility

Results of all quantitative assays (PIP<sub>2</sub> hydrolysis, PIP<sub>3</sub> generation, G<sub>γ</sub> translocation, DAG formation, calcium, cAMP production) were computed as mean±s.e.m. from ≥10 cells in multiple independent experiments (>3) unless otherwise specified. Statistical analysis of the extent of G<sub>γ</sub>9 translocation induced by wild-type and mutant Opn4 was performed using two-tailed unpaired *t*-test. The two means were significantly different at *P*<0.0001.

### Acknowledgements

We thank Prof. Narasimhan Gautam for cDNA for G proteins, GPCRs and sensors; Dr Matthew Toomey for R script generating opsin spectra; Dr Anders Tengholm for providing bi-molecular cAMP probe; Dr John L. Payton, Mithila Tennakoon, Kanishka Senarath and Zehra Fasih for experimental assistance, discussions and comments. We acknowledge the National Eye Institute for providing 11-*cis*-retinal.

### Competing interests

The authors declare no competing or financial interests.

### Author contributions

Conceptualization: D.K., A.K.; Methodology: D.K., K.R., A.K.; Software: D.K., A.K.; Validation: D.K., K.R., A.K.; Formal analysis: D.K., K.R., A.K.; Investigation: D.K., K.R., S.S., A.K.; Resources: A.K.; Writing - original draft: D.K., K.R., S.S., A.K.; Writing - review & editing: D.K., K.R., A.K.; Visualization: D.K., A.K.; Supervision: A.K.; Project administration: A.K.; Funding acquisition: A.K.

### Funding

This work was funded by the University of Toledo.

### Supplementary information

Supplementary information available online at <http://jcs.biologists.org/lookup/doi/10.1242/jcs.212910.supplemental>

### References

- Abrams, P., Andersson, K.-E., Buccafusco, J. J., Chapple, C., de Groat, W. C., Fryer, A. D., Kay, G., Laties, A., Nathanson, N. M., Pasricha, P. J. et al. (2006). Muscarinic receptors: their distribution and function in body systems, and the implications for treating overactive bladder. *Br. J. Pharmacol.* **148**, 565-578.
- Akgoz, M., Kalyanaraman, V. and Gautam, N. (2004). Receptor-mediated reversible translocation of the G protein betagamma complex from the plasma membrane to the Golgi complex. *J. Biol. Chem.* **279**, 51541-51544.
- Akgoz, M., Kalyanaraman, V. and Gautam, N. (2006). G protein betagamma complex translocation from plasma membrane to Golgi complex is influenced by receptor gamma subunit interaction. *Cell. Signal.* **18**, 1758-1768.
- Alexander, S., Peters, J., Mead, A. and Lewis, S. (1999). TiPS receptor and ion channel nomenclature supplement 1999. *Trends Pharmacol. Sci.* **19**, 1.
- Alexander, S. P. H., Christopoulos, A., Davenport, A. P., Kelly, E., Marrion, N. V., Peters, J. A., Faccenda, E., Harding, S. D., Pawson, A. J., Sharman, J. L. et al. (2017). The concise guide to pharmacology 2017/18: G protein-coupled receptors. *Br. J. Pharmacol.* **174** Suppl. 1, S17-S129.
- Allen, A. E., Storchi, R., Martial, F. P., Petersen, R. S., Montemurro, M. A., Brown, T. M. and Lucas, R. J. (2014). Melanopsin-driven light adaptation in mouse vision. *Curr. Biol.* **24**, 2481-2490.
- Bailes, H. J. and Lucas, R. J. (2013). Human melanopsin forms a pigment maximally sensitive to blue light (lambda<sub>max</sub> approximately 479 nm) supporting activation of G(q/11) and G(i/o) signalling cascades. *Proc. Biol. Sci.* **280**, 20122987.
- Beaulé, C., Robinson, B., Lamont, E. W. and Amir, S. (2003). Melanopsin in the circadian timing system. *J. Mol. Neurosci.* **21**, 73-89.
- Bellingham, J., Chaurasia, S. S., Melyan, Z., Liu, C., Cameron, M. A., Tarttelin, E. E., Iuvone, P. M., Hankins, M. W., Tosini, G. and Lucas, R. J. (2006). Evolution of melanopsin photoreceptors: discovery and characterization of a new melanopsin in nonmammalian vertebrates. *PLoS Biol.* **4**, e254.
- Bondar, A. and Lazar, J. (2014). Dissociated GalphaGTP and Gbetagamma protein subunits are the major activated form of heterotrimeric Gi/o proteins. *J. Biol. Chem.* **289**, 12711-12811.
- Brown, T. M., Tsujimura, S.-I., Allen, A. E., Wynne, J., Bedford, R., Vickery, G., Vugler, A. and Lucas, R. J. (2012). Melanopsin-based brightness discrimination in mice and humans. *Curr. Biol.* **22**, 1134-1141.
- Camps, M., Hou, C., Sidiropoulos, D., Stock, J. B., Jakobs, K. H. and Gierschik, P. (1992). Stimulation of phospholipase C by guanine-nucleotide-binding protein beta gamma subunits. *Eur. J. Biochem.* **206**, 821-831.
- Chen, C. L., Wang, Y., Sesaki, H. and Iijima, M. (2012). Myosin I links PIP<sub>3</sub> signaling to remodeling of the actin cytoskeleton in chemotaxis. *Sci. Signal.* **5**, ra10.
- Dubocovich, M. L. and Markowska, M. (2005). Functional MT1 and MT2 melatonin receptors in mammals. *Endocrine* **27**, 101-110.
- Dubocovich, M. L., Rivera-Bermudez, M. A., Gerdin, M. J. and Masana, M. I. (2003). Molecular pharmacology, regulation and function of mammalian melatonin receptors. *Front. Biosci.* **8**, d1093-d1108.
- Dyachok, O., Isakov, Y., Ságetorp, J. and Tengholm, A. (2006). Oscillations of cyclic AMP in hormone-stimulated insulin-secreting beta-cells. *Nature* **439**, 349-352.
- Enezi, J., Revell, V., Brown, T., Wynne, J., Schlagen, L. and Lucas, R. (2011). A "melanopic" spectral efficiency function predicts the sensitivity of melanopsin photoreceptors to polychromatic lights. *J. Biol. Rhythms* **26**, 314-323.
- Ferguson, S. S. G. and Caron, M. G. (1998). G protein-coupled receptor adaptation mechanisms. *Semin. Cell Dev. Biol.* **9**, 119-127.
- Gainetdinov, R. R., Premont, R. T., Bohn, L. M., Lefkowitz, R. J. and Caron, M. G. (2004). Desensitization of G protein-coupled receptors and neuronal functions. *Annu. Rev. Neurosci.* **27**, 107-144.
- Gallegos, L. L., Kunkel, M. T. and Newton, A. C. (2006). Targeting protein kinase C activity reporter to discrete intracellular regions reveals spatiotemporal differences in agonist-dependent signaling. *J. Biol. Chem.* **281**, 30947-30956.
- Hankins, M. W. and Hughes, S. (2014). Vision: melanopsin as a novel irradiance detector at the heart of vision. *Curr. Biol.* **24**, R1055-R1057.
- Hannila, S. S. and Filbin, M. T. (2008). The role of cyclic AMP signaling in promoting axonal regeneration after spinal cord injury. *Exp. Neurol.* **209**, 321-332.
- Hemrick-Luecke, S. K., Bymaster, F. P., Evans, D. C., Wess, J. and Felder, C. C. (2002). Muscarinic agonist-mediated increases in serum corticosterone levels are abolished in M<sub>2</sub> muscarinic acetylcholine receptor knockout mice. *J. Pharmacol. Exp. Ther.* **303**, 99-103.
- Herlitze, S., Garcia, D. E., Mackie, K., Hille, B., Scheuer, T. and Catterall, W. A. (1996). Modulation of Ca<sup>2+</sup> channels by G-protein beta gamma subunits. *Nature* **380**, 258-262.
- Hughes, S., Welsh, L., Katti, C., González-Menéndez, I., Turton, M., Halford, S., Sekaran, S., Peirson, S. N., Hankins, M. W. and Foster, R. G. (2012). Differential expression of melanopsin isoforms Opn4L and Opn4S during postnatal development of the mouse retina. *PLoS ONE* **7**, e34531.
- Hughes, S., Jagannath, A., Rodgers, J., Hankins, M. W., Peirson, S. N. and Foster, R. G. (2016). Signalling by melanopsin (OPN4) expressing photosensitive retinal ganglion cells. *Eye (Lond)* **30**, 247-254.
- Ikeda, S. R. (1996). Voltage-dependent modulation of N-type calcium channels by G-protein beta gamma subunits. *Nature* **380**, 255-258.
- Itoh, Y., Cai, K. and Khorana, H. G. (2001). Mapping of contact sites in complex formation between light-activated rhodopsin and transducin by covalent crosslinking: use of a chemically preactivated reagent. *Proc. Natl. Acad. Sci. USA* **98**, 4883-4887.
- Kamp, T. J. and Hell, J. W. (2000). Regulation of cardiac L-type calcium channels by protein kinase A and protein kinase C. *Circ. Res.* **87**, 1095-1102.
- Karunaratne, W. K. A., Giri, L., Patel, A. K., Venkatesh, K. V. and Gautam, N. (2013). Optical control demonstrates switch-like PIP<sub>3</sub> dynamics underlying the initiation of immune cell migration. *Proc. Natl. Acad. Sci. USA* **110**, E1575-E1583.
- Katoh, K. and Standley, D. M. (2013). MAFFT multiple sequence alignment software version 7: improvements in performance and usability. *Mol. Biol. Evol.* **30**, 772-780.
- Katoh, K., Misawa, K., Kuma, K. and Miyata, T. (2002). MAFFT: a novel method for rapid multiple sequence alignment based on fast Fourier transform. *Nucleic Acids Res.* **30**, 3059-3066.
- Kawano, T., Chen, L., Watanabe, S. Y., Yamauchi, J., Kaziro, Y., Nakajima, Y., Nakajima, S. and Itoh, H. (1999). Importance of the G protein gamma subunit in activating G protein-coupled inward rectifier K(+) channels. *FEBS Lett.* **463**, 355-359.
- Kolsch, V., Charest, P. G. and Firtel, R. A. (2008). The regulation of cell motility and chemotaxis by phospholipid signaling. *J. Cell Sci.* **121**, 551-559.
- Koyanagi, M., Takano, K., Tsukamoto, H., Ohtsu, K., Tokunaga, F. and Terakita, A. (2008). Jellyfish vision starts with cAMP signaling mediated by opsin-G(s) cascade. *Proc. Natl. Acad. Sci. USA* **105**, 15576-15580.
- Lehmann, D. M., Seneviratne, A. M. P. B. and Smrcka, A. V. (2008). Small molecule disruption of G protein βγ subunit signaling inhibits neutrophil chemotaxis and inflammation. *Mol. Pharmacol.* **73**, 410-418.
- Li, S., Yang, C., Zhang, L., Gao, X., Wang, X., Liu, W., Wang, Y., Jiang, S., Wong, Y. H., Zhang, Y. et al. (2016). Promoting axon regeneration in the adult CNS by modulation of the melanopsin/GPCR signaling. *Proc. Natl. Acad. Sci. USA* **113**, 1937-1942.
- Masseck, O. A., Spoida, K., Dalkara, D., Maejima, T., Rubelowski, J. M., Wallhorn, L., Deneris, E. S. and Herlitze, S. (2014). Vertebrate cone opsins enable sustained and highly sensitive rapid control of Gi/o signaling in anxiety circuitry. *Neuron* **81**, 1263-1273.

- Mayeenuddin, L. H., McIntire, W. E. and Garrison, J. C. (2006). Differential sensitivity of P-Rex1 to isoforms of G protein betagamma dimers. *J. Biol. Chem.* **281**, 1913-1920.
- Nakajima, Y., Nakajima, S. and Kozasa, T. (1996). Activation of G protein-coupled inward rectifier K<sup>+</sup> channels in brain neurons requires association of G protein beta gamma subunits with cell membrane. *FEBS Lett.* **390**, 217-220.
- Niu, J., Profirovic, J., Pan, H., Vaiskunaitė, R. and Voyno-Yasenetskaya, T. (2003). G Protein betagamma subunits stimulate p114RhoGEF, a guanine nucleotide exchange factor for RhoA and Rac1: regulation of cell shape and reactive oxygen species production. *Circ. Res.* **93**, 848-856.
- Offermanns, S., Wieland, T., Homann, D., Sandmann, J., Bombien, E., Spicher, K., Schultz, G. and Jakobs, K. H. (1994). Transfected muscarinic acetylcholine receptors selectively couple to Gi-type G proteins and Gq/11. *Mol. Pharmacol.* **45**, 890-898.
- Panda, S., Provencio, I., Tu, D. C., Pires, S. S., Rollag, M. D., Castrucci, A. M., Pletcher, M. T., Sato, T. K., Wiltshire, T., Andahazy, M. et al. (2003). Melanopsin is required for non-image-forming photic responses in blind mice. *Science* **301**, 525-527.
- Park, D., Jhon, D. Y., Lee, C. W., Lee, K. H. and Rhee, S. G. (1993). Activation of phospholipase C isozymes by G protein beta gamma subunits. *J. Biol. Chem.* **268**, 4573-4576.
- Pilorz, V., Tam, S. K. E., Hughes, S., Pothecary, C. A., Jagannath, A., Hankins, M. W., Bannerman, D. M., Lightman, S. L., Vyazovskiy, V. V., Nolan, P. M. et al. (2016). Melanopsin regulates both sleep-promoting and arousal-promoting responses to light. *PLoS Biol.* **14**, e1002482.
- Pires, S. S., Shand, J., Bellingham, J., Arrese, C., Turton, M., Peirson, S., Foster, R. G. and Halford, S. (2007). Isolation and characterization of melanopsin (Opn4) from the Australian marsupial *Sminthopsis crassicaudata* (fat-tailed dunnart). *Proc. Biol. Sci.* **274**, 2791-2799.
- Pires, S. S., Hughes, S., Turton, M., Melyan, Z., Peirson, S. N., Zheng, L., Kosmaoglou, M., Bellingham, J., Cheetham, M. E., Lucas, R. J. et al. (2009). Differential expression of two distinct functional isoforms of melanopsin (Opn4) in the mammalian retina. *J. Neurosci.* **29**, 12332-12342.
- Pitcher, J. A., Inglese, J., Higgins, J. B., Arriza, J. L., Casey, P. J., Kim, C., Benovic, J. L., Kwatra, M. M., Caron, M. G. and Lefkowitz, R. J. (1992). Role of beta gamma subunits of G proteins in targeting the beta-adrenergic receptor kinase to membrane-bound receptors. *Science* **257**, 1264-1267.
- Raible, F., Tessmar-Raible, K., Arboleda, E., Kaller, T., Bork, P., Arendt, D. and Arnone, M. I. (2006). Opsins and clusters of sensory G-protein-coupled receptors in the sea urchin genome. *Dev. Biol.* **300**, 461-475.
- Ribeiro-Neto, F. A. and Rodbell, M. (1989). Pertussis toxin induces structural changes in G alpha proteins independently of ADP-ribosylation. *Proc. Natl. Acad. Sci. USA* **86**, 2577-2581.
- Senarath, K., Ratnayake, K., Siripurapu, P., Payton, J. L. and Karunaratne, A. (2016). Reversible G protein betagamma9 distribution-based assay reveals molecular underpinnings in subcellular, single-cell, and multicellular GPCR and G protein activity. *Anal. Chem.* **88**, 11450-11459.
- Senarath, K., Payton, J. L., Kankanamge, D., Siripurapu, P., Tennakoon, M. and Karunaratne, A. (2018). Ggamma identity dictates efficacy of Gbetagamma signaling and macrophage migration. *J. Biol. Chem.* **293**, 2974-2989.
- Siripurapu, P., Kankanamge, D., Ratnayake, K., Senarath, K. and Karunaratne, A. (2017). Two independent but synchronized Gbetagamma subunit-controlled pathways are essential for trailing-edge retraction during macrophage migration. *J. Biol. Chem.* **292**, 17482-17495.
- Smrcka, A. V. and Sternweis, P. C. (1993). Regulation of purified subtypes of phosphatidylinositol-specific phospholipase C beta by G protein alpha and beta gamma subunits. *J. Biol. Chem.* **268**, 9667-9674.
- Spencer, T. and Filbin, M. T. (2004). A role for cAMP in regeneration of the adult mammalian CNS. *J. Anat.* **204**, 49-55.
- Sunahara, R. K. and Taussig, R. (2002). Isoforms of mammalian adenylyl cyclase: multiplicities of signaling. *Mol. Interv.* **2**, 168-184.
- Takasaki, J., Saito, T., Taniguchi, M., Kawasaki, T., Moritani, Y., Hayashi, K. and Kobori, M. (2004). A novel Galphaq/11-selective inhibitor. *J. Biol. Chem.* **279**, 47438-47445.
- Tang, W. and Gilman, A. (1991). Type-specific regulation of adenylyl cyclase by G protein beta gamma subunits. *Science* **254**, 1500-1503.
- Terakita, A. (2005). The opsins. *Genome Biol.* **6**, 213.
- Terrillon, S. and Bouvier, M. (2004). Roles of G-protein-coupled receptor dimerization. *EMBO Rep.* **5**, 30-34.
- Ueda, H., Nagae, R., Kozawa, M., Morishita, R., Kimura, S., Nagase, T., Ohara, O., Yoshida, S. and Asano, T. (2008). Heterotrimeric G protein betagamma subunits stimulate FLJ00018, a guanine nucleotide exchange factor for Rac1 and Cdc42. *J. Biol. Chem.* **283**, 1946-1953.
- van Oosterhout, F., Fisher, S. P., van Diepen, H. C., Watson, T. S., Houben, T., VanderLeest, H. T., Thompson, S., Peirson, S. N., Foster, R. G. and Meijer, J. H. (2012). Ultraviolet light provides a major input to non-image-forming light detection in mice. *Curr. Biol.* **22**, 1397-1402.
- van Unen, J., Stumpf, A. D., Schmid, B., Reinhard, N. R., Hordijk, P. L., Hoffmann, C., Gadella, T. W. J., Jr and Goedhart, J. (2016). A new generation of FRET sensors for robust measurement of G $\alpha$ 1, G $\alpha$ 2 and G $\alpha$ 3 activation kinetics in single cells. *PLoS ONE* **11**, e0146789.
- Weiner, O. D. (2002). Rac activation: P-Rex1 — a convergence point for PIP3 and G $\beta\gamma$ ? *Curr. Biol.* **12**, R429-R431.
- Wu, D., Katz, A. and Simon, M. I. (1993). Activation of phospholipase C beta 2 by the alpha and beta gamma subunits of trimeric GTP-binding protein. *Proc. Natl. Acad. Sci. USA* **90**, 5297-5301.
